# Supplementary material
Source: Royal Society of Chemistry journal article supplement (doi:10.1039/d6gc01485b)
Supplement: d6gc01485b1.pdf [file d6gc01485b1.pdf]

Supplementary Information for

## **Promoting H<sub>2</sub>O<sub>2</sub> Production via Molten-Salt-Engineered Carbon Nitride Photocatalyst in a Triphasic Membrane Reactor**

Zirui You<sup>1,#</sup>, Chuyue Lu<sup>1,#</sup>, Jinpeng Hu<sup>1</sup>, Xinxing Li<sup>1</sup>, Jijia Sun<sup>1</sup>, Yucong Huang<sup>1</sup>, Fangrun Jin<sup>1</sup>, Guanwu Lian<sup>1</sup>, Wenguang Tu<sup>1</sup>, Oleksandr Savateev<sup>2</sup>, Jingjing Xiong<sup>1,\*</sup>, Dongxu Ji<sup>1,\*</sup>, Zhigang Zou<sup>1</sup>, Zhongxin Chen<sup>1,\*</sup>

# These authors contributed equally to this work. \* Correspondence and requests for materials should be addressed to J. Xiong ([jingjixiong@cuhk.edu.cn](mailto:jingjixiong@cuhk.edu.cn)), D. Ji ([jidongxu@cuhk.edu.cn](mailto:jidongxu@cuhk.edu.cn)), and Z. Chen ([chenzhongxin@cuhk.edu.cn](mailto:chenzhongxin@cuhk.edu.cn))

<sup>1</sup> Guangdong Basic Research Center of Excellence for Aggregate Science, School of Science and Engineering, The Chinese University of Hong Kong, Shenzhen, Guangdong, 518172, China.

<sup>2</sup> Department of Chemistry, The Chinese University of Hong Kong, Hong Kong, China.

## Supplementary Methods

**Instruments:** X-ray diffraction (XRD) data were collected using a Rigaku Smartlab with Cu  $K_{\alpha}$  radiation (40 kV, 40 mA). Scanning electron microscopy (SEM) images were captured with an MAIA 3 LMH at 12 kV, which is equipped with an energy-dispersive spectrometer (EDS) for elemental composition analysis. Fourier transform infrared spectroscopy (FTIR) spectra were measured by a PerkinElmer Spectrum Two™ FTIR spectrometer. The electrochemical measurement was performed using a Corrtest multichannel potentiostat, model CS310X. Rotational ring-disk electrode (RRDE) data were measured by a Corrtest multichannel potentiostat CS310X, combined with a Modulated Speed Rotator from Pine Research Instrument. O<sub>2</sub> temperature-programmed desorption (O<sub>2</sub>-TPD) measurements were conducted using a Micromeritics AutoChem II 2920. X-ray photoelectron spectroscopy (XPS) and valence band XPS (VBXPS) data were collected by Thermo Scientific K-Alpha. High-resolution transmission electron microscopy (HRTEM) images were captured by JEOL JEM-F200. Photoluminescence and time-resolved photoluminescence spectra were obtained by using Edinburgh FLS1000. Mercury intrusion porosimetry measurement was conducted with Micromeritics AutoPore IV 9510.

**Quantitative Determination of H<sub>2</sub>O<sub>2</sub> using Iodometry:** The concentration of H<sub>2</sub>O<sub>2</sub> was measured by a typical iodometry method. In detail, 0.2 mL of potassium iodide aqueous solution (KI, 0.4 M) and 0.2 mL of potassium hydrogen phthalate aqueous solution (HOCC<sub>6</sub>H<sub>4</sub>COOK, 0.1 M) were added to the sample solution with a dilution factor of 15 times. After at least 2 hours, the H<sub>2</sub>O<sub>2</sub> concentration was determined by

measuring its absorbance at 351 nm using UV-vis spectroscopy via external standards.

The standard calibration curve for H<sub>2</sub>O<sub>2</sub> concentration is provided in **Figure S2**.

**Photoelectrochemical Characterization:** The electrochemical measurement was carried out with a Corrtest multichannel potentiostat CS310X in a conventional three-electrode cell, with a glassy carbon electrode (working electrode), a Pt plate (counter electrode), and an Ag/AgCl reference electrode. The catalyst inks were prepared by dispersing 10 mg of catalyst in 50  $\mu$ L of Nafion, 475  $\mu$ L of ethanol, and 475  $\mu$ L of water. Then, 10  $\mu$ L of catalyst ink was extracted and evenly coated onto a glassy carbon electrode with a diameter of 3 mm. 0.5 M Na<sub>2</sub>SO<sub>4</sub> was used as the electrolyte. The electrochemical impedance spectroscopy (EIS) and the photocurrent tests were carried out under the irradiation of a Xenon light source (300 W). The following formula is applied to convert potential *vs.* Ag/AgCl to potential *vs.* RHE at room temperature:

$$E_{RHE} = E_{Ag/AgCl} + E_{Ag/AgCl}^{0 \text{ vs. RHE}} + 0.591 * pH = E_{Ag/AgCl} + 0.197 \text{ V} + 0.4137 \text{ V}$$

**Fabrication of Mixed Matrix MS g-CN Membrane:**

A mixed matrix MS g-CN membrane was prepared by solvent-induced phase separation. Typically, 265 mg of polyvinylidene fluoride (PVDF) and 45 mg of MS g-CN catalysts were dissolved in 10 mL of N-methyl-2-pyrrolidone (NMP) solvent. After two hours of stirring at 60 °C, 700 mg of PVDF was added. A mixed matrix MS g-CN membrane was then fabricated by the blade casting method onto a glass plate.

**Apparent Quantum Yields (AQYs):** AQYs were obtained using LED lights at various wavelengths (365, 420, 450, 485, 520, and 630 nm). The calculation is given by <sup>12</sup>

$$AQY = \frac{2n}{N_{aph}} \times 100\% = \frac{2MN_A \hbar c}{PSt\lambda} \times 100\%$$

where  $M$  is the number of  $H_2O_2$  molecules in mole,  $N_A$  is the Avogadro's constant ( $6.022 \times 10^{23} \text{ mol}^{-1}$ ),  $\hbar$  is the Planck's constant ( $6.626 \times 10^{-34} \text{ J}\cdot\text{s}$ ),  $c$  is the speed of light ( $3 \times 10^8 \text{ m s}^{-1}$ ),  $P$  is the light intensity ( $50 \text{ mW cm}^{-2}$ ),  $S$  is the irradiation area ( $11.341 \text{ cm}^2$  with a diameter of  $3.8 \text{ cm}$ ), and  $\lambda$  is the wavelength of the light in meters.

For example, under the irradiation of blue light ( $450 \text{ nm}$ ) for  $30 \text{ min}$ ,  $M = 3.608 \text{ mM} \times 25 \text{ mL} = 9.02 \times 10^{-5} \text{ mol}$ , then AQY was calculated as follows:

$$\begin{aligned} \text{Apparent Quantum Yield (AQY)} \\ &= \frac{2 * (9.02 \times 10^{-5} \text{ mol}) * (6.022 \times 10^{23} \text{ mol}^{-1}) * (6.626 \times 10^{-34} \text{ J}\cdot\text{s}) * (3 \times 10^8 \text{ m s}^{-1})}{(0.05 \text{ W/cm}^2) * (11.341 \text{ cm}^2) * (1800 \text{ s}) * (450 \times 10^{-9} \text{ m})} \\ &= 6.062\% \end{aligned}$$

**In-situ FTIR Measurement:** In situ diffuse reflectance infrared Fourier transform spectroscopy (DRIFTS) was conducted on a Bruker INVENIO S FTIR spectrometer (Germany) equipped with an MCT detector, using a Harrick in situ diffuse-reflectance reaction chamber operated in DRIFT mode. Photo-irradiation was supplied by a  $300 \text{ W}$  xenon lamp and directed into the chamber to illuminate the sample during spectral acquisition.

**Computational Fluid Dynamics (CFD) Simulation:** A two-dimensional layered porous media model was constructed in COMSOL Multiphysics to investigate the counterflow behavior of oxygen and water in a macroporous/microporous composite structure. As illustrated in **Figure S1**, the model comprises a macroporous layer on top and a microporous layer underneath. The geometric parameters, operating conditions,

and material properties used in the simulations are summarized in **Table S1**. The thicknesses of the macroporous and microporous layers were set to  $H_{\text{mac}} = 150 \mu\text{m}$  and  $H_{\text{mic}} = 30 \mu\text{m}$ , respectively, and the total model width was defined as  $W = 500 \mu\text{m}$ . This width was chosen to include a sufficient number of macropores and micropores, ensuring that the resulting gas-liquid interface distributions are statistically representative.

In the model, water was introduced from the top boundary, while oxygen was supplied from the bottom boundary, forming a counterflow configuration. The average pore sizes of the macroporous and microporous layers were  $d_{\text{mac}} = 57 \mu\text{m}$  and  $d_{\text{mic}} = 1.51 \mu\text{m}$ , respectively, with a porosity of 0.5 for both layers. These geometric parameters, together with the contact angles of each layer, were obtained from experimental measurements, while the model width was defined based on numerical considerations. The pore structures were generated using a random distribution algorithm under the prescribed geometric constraints, and a representative geometry was consistently applied across all simulations.

To simplify the problem and focus on the evolution of the gas-liquid interface in layered porous media, the following assumptions were adopted in the numerical model:

- (1) Both gas and liquid phases were treated as incompressible fluids, and density variations during the flow process were neglected.
- (2) All simulations were conducted under isothermal conditions with the temperature fixed at 298.15 K, and the effects of temperature variations on fluid properties,

including density, viscosity, and surface tension, were not considered.

(3) Given that the characteristic length scale of the porous structures is on the order of micrometers, capillary forces dominate the flow behavior; therefore, gravitational effects on the two-phase flow and interfacial morphology were neglected.

(4) The model focuses exclusively on the hydrodynamics and interfacial evolution of the gas-liquid system, without considering phase change, dissolution, or chemical reactions.

Based on these assumptions, a laminar two-phase flow framework was employed to describe the counterflow of oxygen and water within the layered porous media. Water was introduced from the top boundary, while oxygen was supplied from the bottom boundary. Constant pressure boundary conditions were applied at the top and bottom boundaries, and all remaining boundaries were treated as no-slip walls. Initially, the entire computational domain was filled with the gas phase.

The laminar two-phase flow was simulated using the level set method to track the gas-liquid interface. The flow field satisfies the continuity equation,

$$\nabla \cdot \mathbf{u} = 0 \quad \text{\* MERGEFORMAT (1.1)}$$

and the incompressible Navier–Stokes equation,

$$\rho \left( \frac{\partial \mathbf{u}}{\partial t} + \mathbf{u} \cdot \nabla \mathbf{u} \right) = -\nabla p + \nabla \cdot \left[ \mu \left( \nabla \mathbf{u} + (\nabla \mathbf{u})^T \right) \right] + \mathbf{F}_{st} \text{\*}$$

MERGEFORMAT (1.2)

where  $u$  is the velocity vector, and  $p$  is the pressure. The density  $\rho$  and viscosity  $\mu$  depend on the local phase distribution and were calculated using the level set function  $\phi$ :

$$\rho = \phi\rho_l + (1 - \phi)\rho_g \quad \backslash* \text{MERGEFORMAT (1.3)}$$

$$\mu = \phi\mu_l + (1 - \phi)\mu_g \quad \backslash* \text{MERGEFORMAT (1.4)}$$

where the subscripts  $l$  and  $g$  denote the liquid and gas phases. The interface motion is described by the level set equation,

$$\frac{\partial\phi}{\partial t} + \mathbf{u} \cdot \nabla\phi = \gamma_{ls} \nabla \cdot (\hat{\mathbf{c}}_{ls} \nabla\phi - \phi(1 - \phi)\mathbf{n}) \backslash*$$

MERGEFORMAT (1.5)

where  $\phi$  is the level set function,  $\epsilon_{ls}$  is the interface thickness parameter,  $\gamma_{ls}$  is the reinitialization parameter, and  $\mathbf{n}$  is the unit normal vector.

The bottom boundary of the model was set as the oxygen inlet, with a pressure of 1 atm, while the top boundary was set as the water inlet, also at a pressure of 1 atm. All other boundaries were treated as no-slip walls. The whole domain was initially filled with the gas phase. Water and oxygen were then introduced from the top and bottom boundaries, respectively. Gravity was neglected in all simulations.

## Supplementary Figures

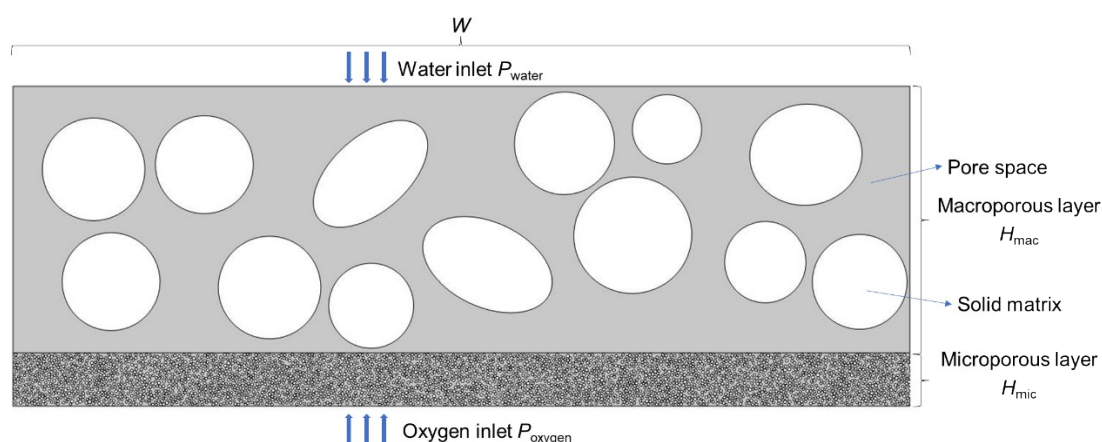

**Figure S1.** Schematic diagram of the layered porous media model used in the simulations.

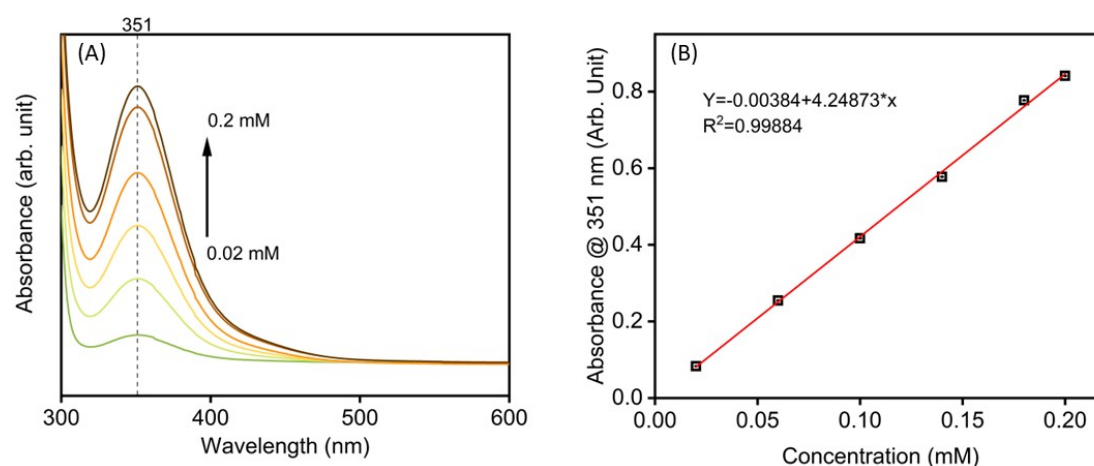

**Figure S2. Iodometry determination of  $H_2O_2$  concentration.** (A) UV-Vis absorption spectra; (B) Calibration curve of the maximum absorption at 351 nm used for concentration determination.

The photocatalyst powder was dispersed in 25 mL of 10% aqueous isopropanol and irradiated for a random reaction time. A 1 mL aliquot of the same reaction batch was taken after the reaction. The original  $H_2O_2$  concentration ( $C_{origin}$ ) was determined directly by the iodometric method. Before measuring the second aliquot, 1 mL of a

standard H<sub>2</sub>O<sub>2</sub> solution was added. Based on the known original concentration and the added standard concentration, we calculated the theoretical H<sub>2</sub>O<sub>2</sub> concentration after mixing (C<sub>calculated</sub>) and compared it with the measured concentration (C<sub>test</sub>). The apparent recovery was therefore calculated:

$$\text{Recovery (\%)} = [1 - |C_{\text{test}} - C_{\text{calculated}}| / C_{\text{calculated}}] \times 100$$

Three independent tests using this method yielded recovery values of 91.7%, 93.2%, and 91.6%, respectively, for an average recovery of 92.2%. The results of this study indicate that the iodometric method provides acceptable analytical accuracy for measuring H<sub>2</sub>O<sub>2</sub> over the concentration range relevant to this study. During UV-vis analysis, the absorbance was always maintained below 1.0 to ensure that the Beer-Lambert law remained valid within the linear response range. For the higher H<sub>2</sub>O<sub>2</sub> concentrations, corresponding dilutions were performed before measurement.

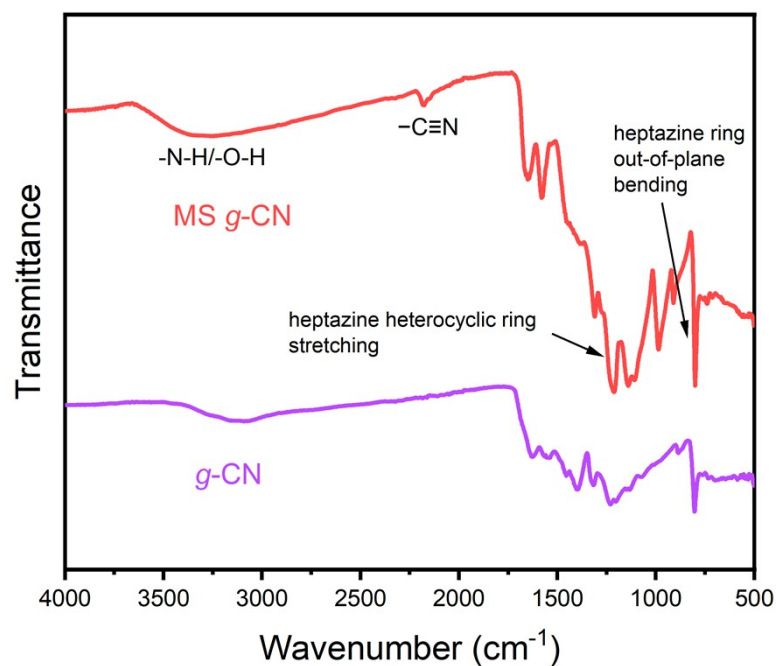

**Figure S3.** FTIR spectra of *g*-CN and MS *g*-CN photocatalysts.

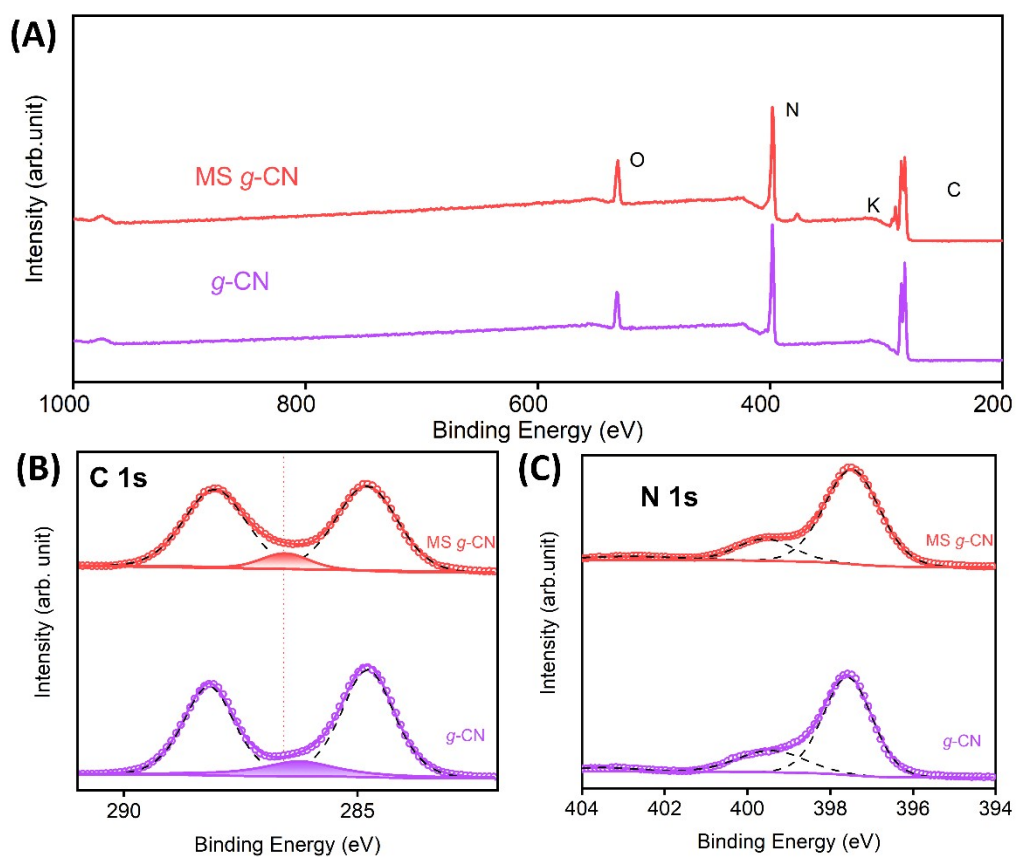

**Figure S4.** XPS spectra of the pristine *g*-CN and MS *g*-CN photocatalysts. (A)

Survey, (B) C 1s core-level, and (C) N 1s core-level spectra.

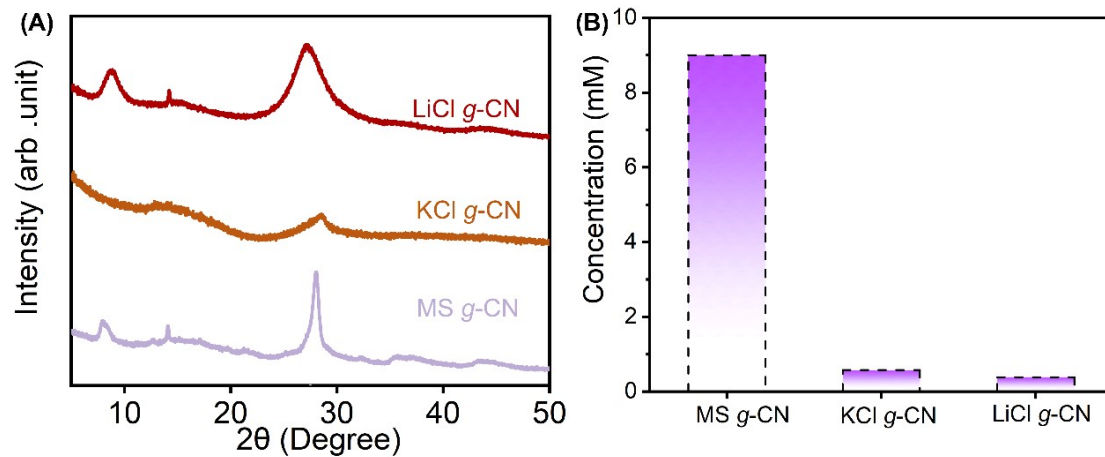

**Figure S5.** Eutectic molten-salt treatment outperforms single-salt treatment in (A) structural regulation and (B) photocatalytic performance of *g*-CN.

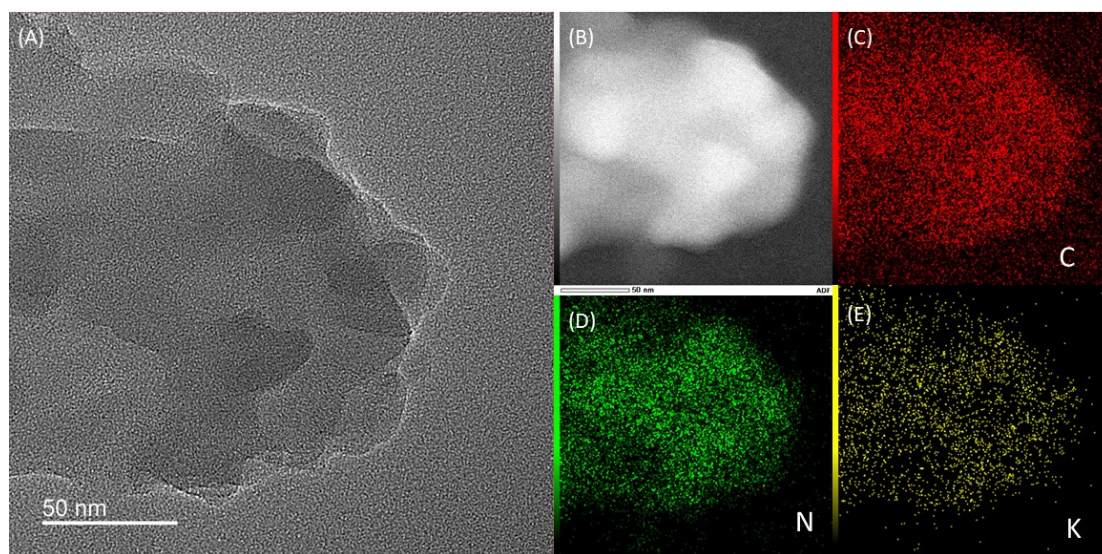

**Figure S6.** HRTEM morphology of the MS *g*-CN photocatalyst. (A) HRTEM image, (B-E) the corresponding EDS mappings.

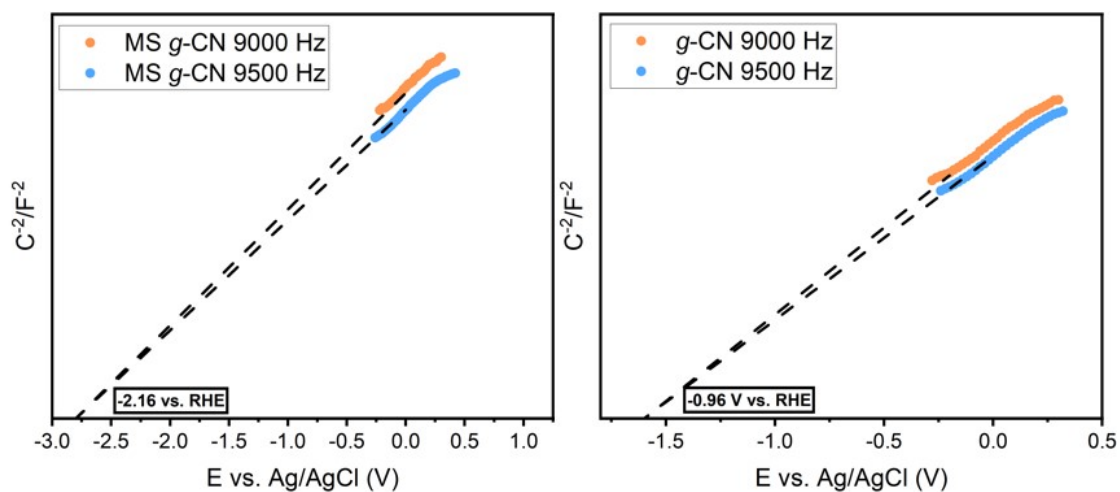

**Figure S7.** Mott-Schottky plots of (a) MS *g*-CN and (b) *g*-CN photocatalysts.

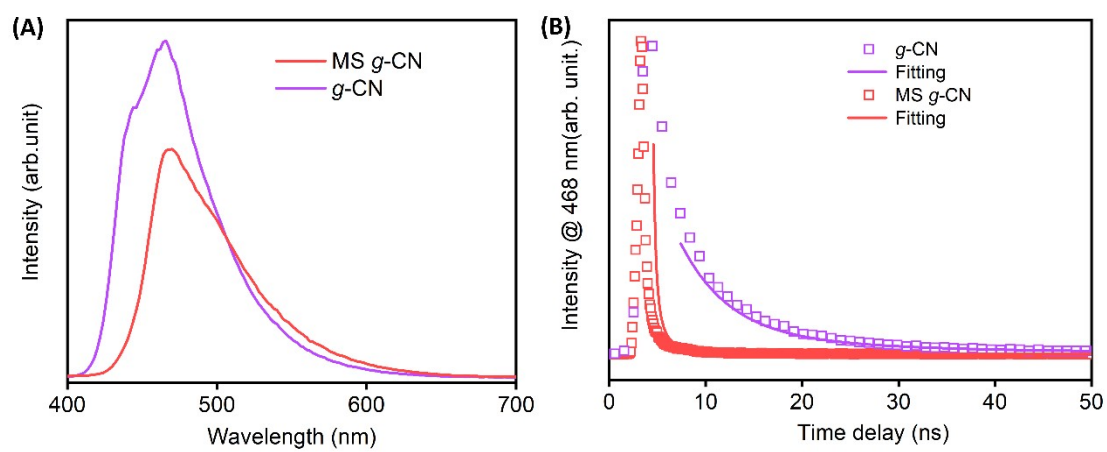

**Figure S8.** (A) PL and (B) TRPL spectra of the pristine *g*-CN and MS *g*-CN.

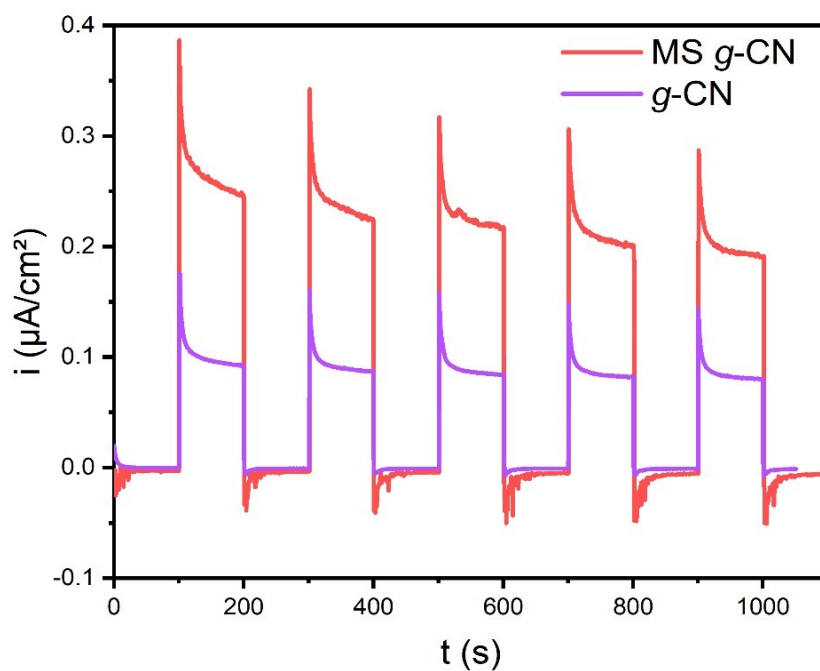

**Figure S9.** Transient photocurrent responses of pristine *g*-CN and MS *g*-CN.

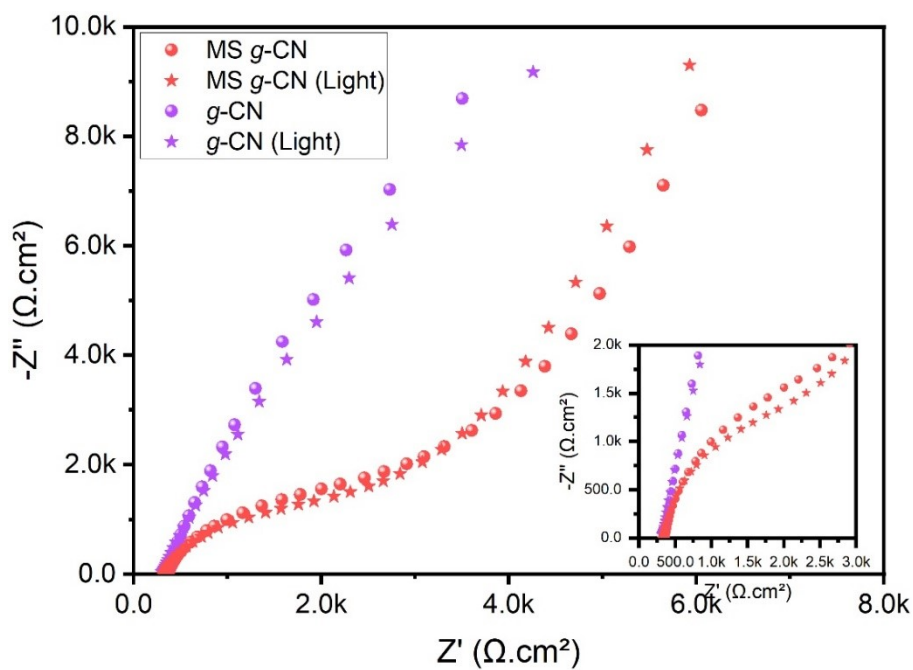

**Figure S10.** Electrochemical impedance spectra of *g*-CN and MS *g*-CN photocatalysts in the dark and in the light. The inset shows the enlarged area in the charge-transfer region.

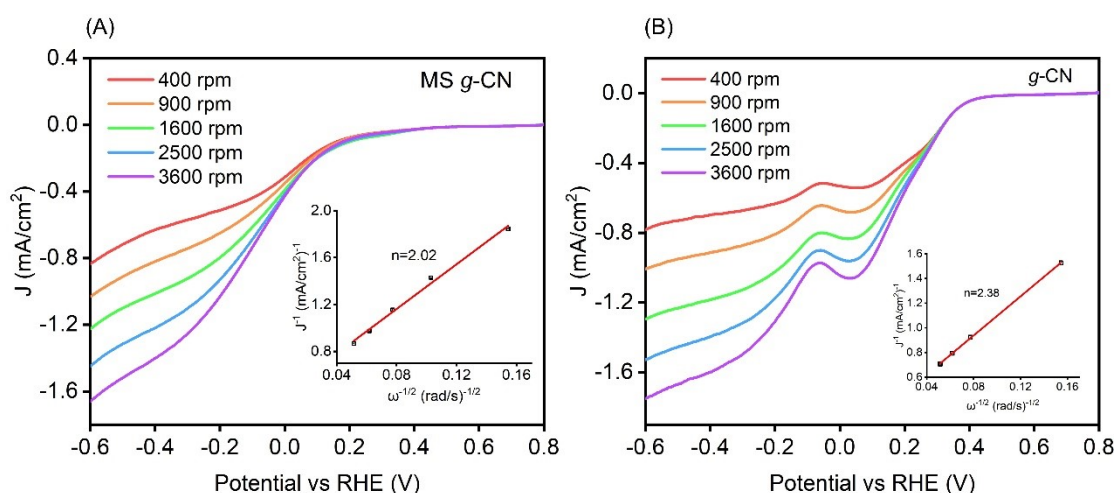

**Figure S11.** RDE linear sweep voltammograms of the oxygen reduction reaction on (A) MS *g*-CN and (B) pristine *g*-CN recorded at rotation rates of 400–3600 rpm, shown as current density ( $j$ ) versus potential (vs RHE). **Insets:** corresponding Koutecky–Levich (K–L) plots used to determine the electron transfer number ( $n$ ), yielding  $n = 2.02$  for MS *g*-CN and  $n = 2.38$  for *g*-CN.

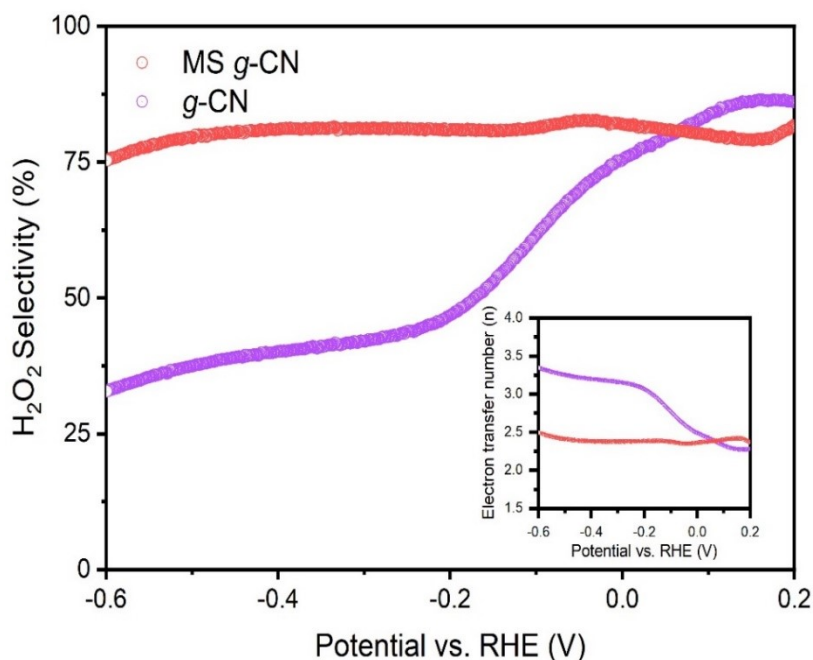

**Figure S12.** The H<sub>2</sub>O<sub>2</sub> selectivity of pristine *g*-CN and MS *g*-CN, with an inset showing the number of electrons transferred.

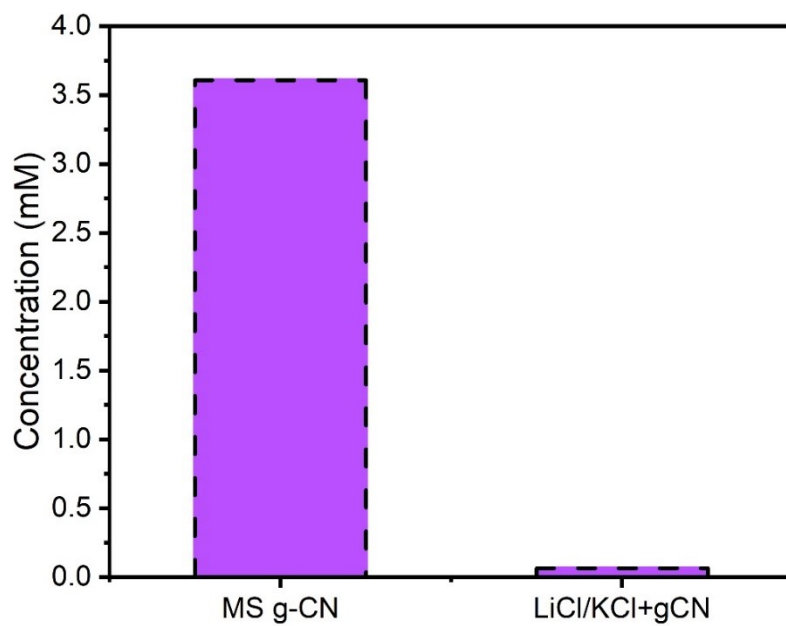

**Figure S13.** Comparison of the performance of MS g-CN and pristine g-CN, together with LiCl and KCl.

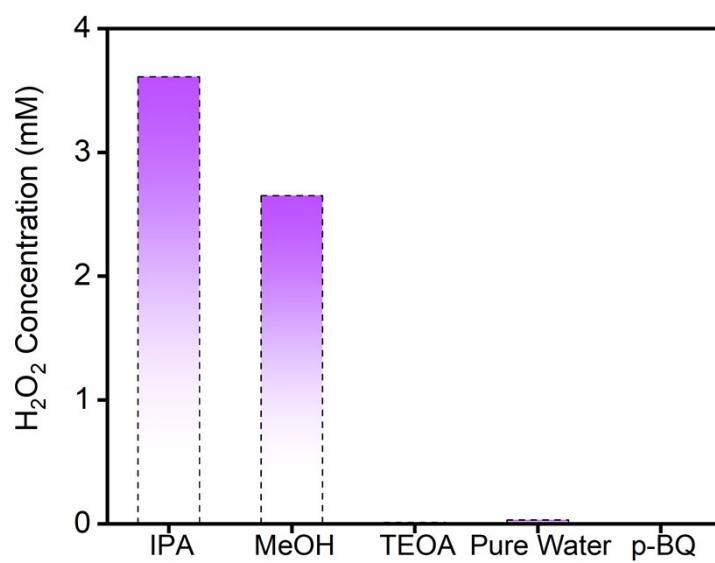

**Figure S14.** Photocatalytic H<sub>2</sub>O<sub>2</sub> production of MS g-CN using various sacrificial agents at 450 nm.

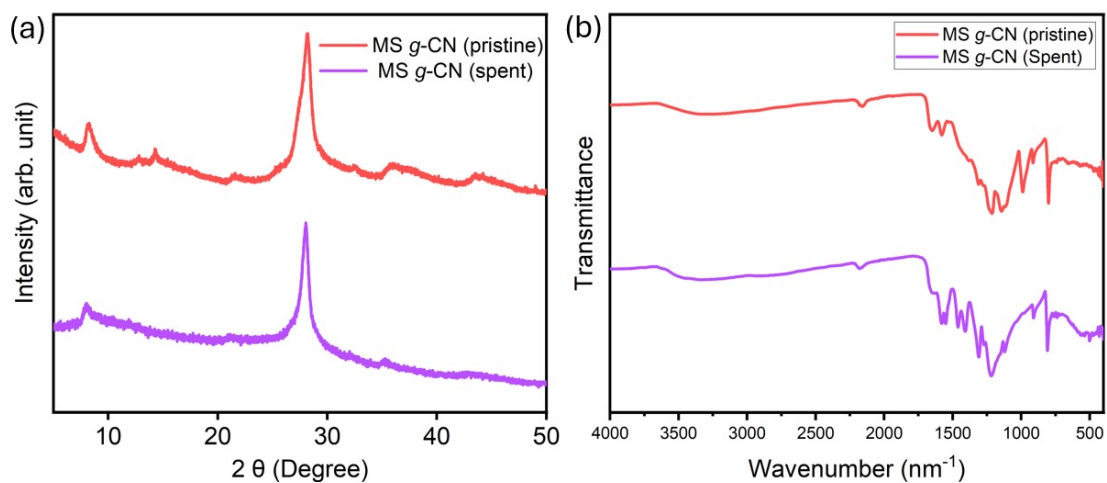

**Figure S15.** (a) XRD patterns and (b) FTIR spectra of the pristine and spent MS *g*-CN photocatalysts after five catalytic cycles.

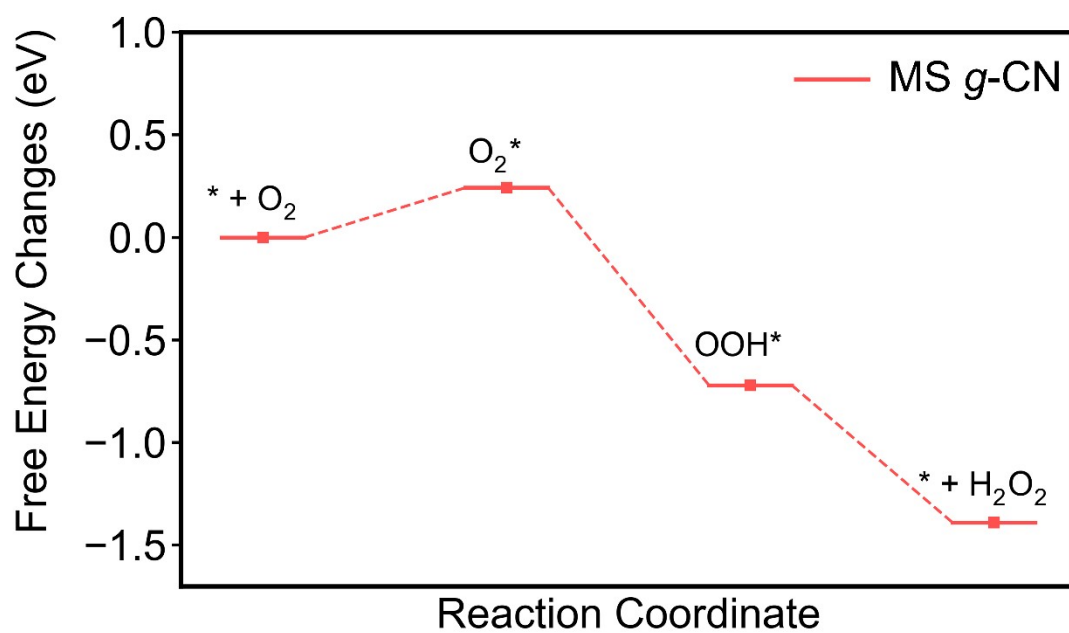

**Figure S16.** DFT-calculated reaction coordinates over the MS *g*-CN catalyst. No favorable  $\text{O}_2$  adsorption was observed over the pristine *g*-CN catalyst.

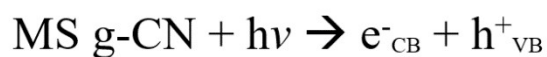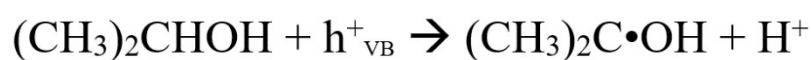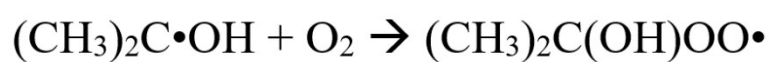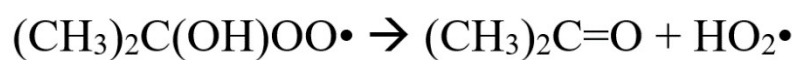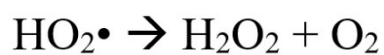

or

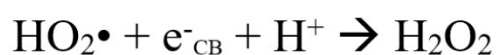

**Figure S17.** Proposed mechanism of photocatalytic  $\text{H}_2\text{O}_2$  production using MS g-CN.

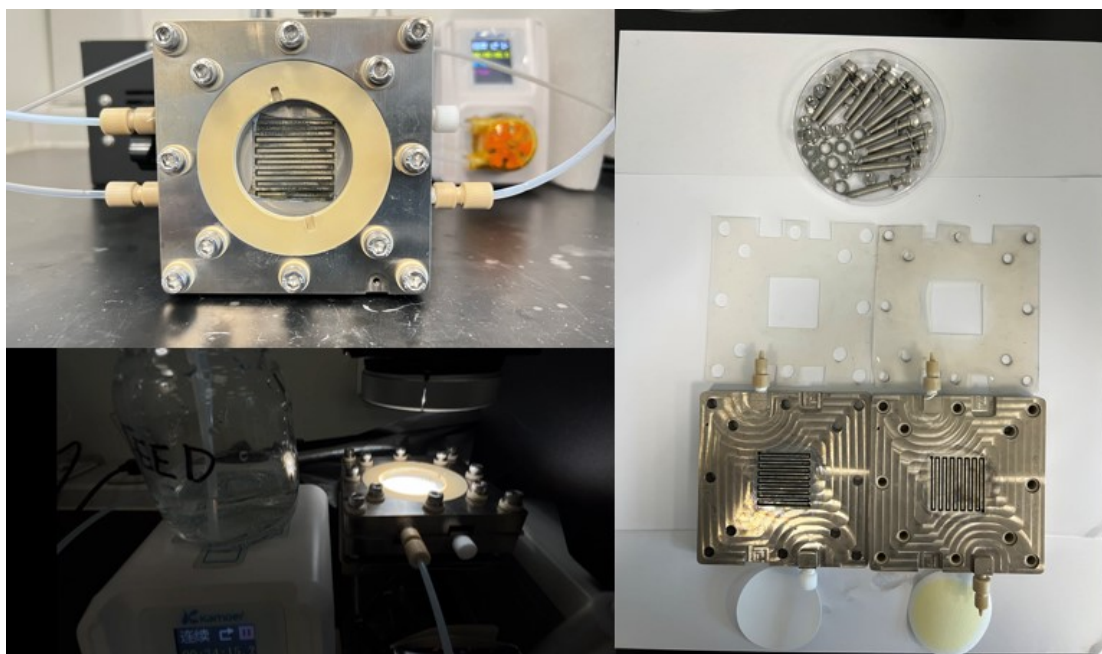

**Figure S18.** Photos of the 9 cm<sup>2</sup> flow membrane reactor. The top left image shows the assembled reactor. The bottom left image illustrates the reactor in operation with illumination. The right image presents a disassembled view of the various components.

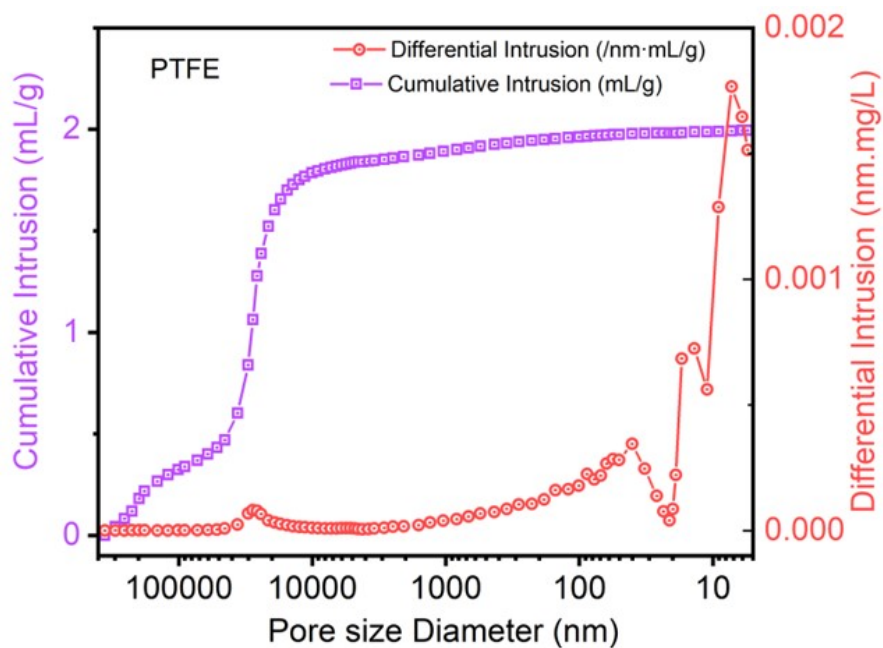

**Figure S19.** Mercury intrusion porosimetry of the pure PTFE membrane.

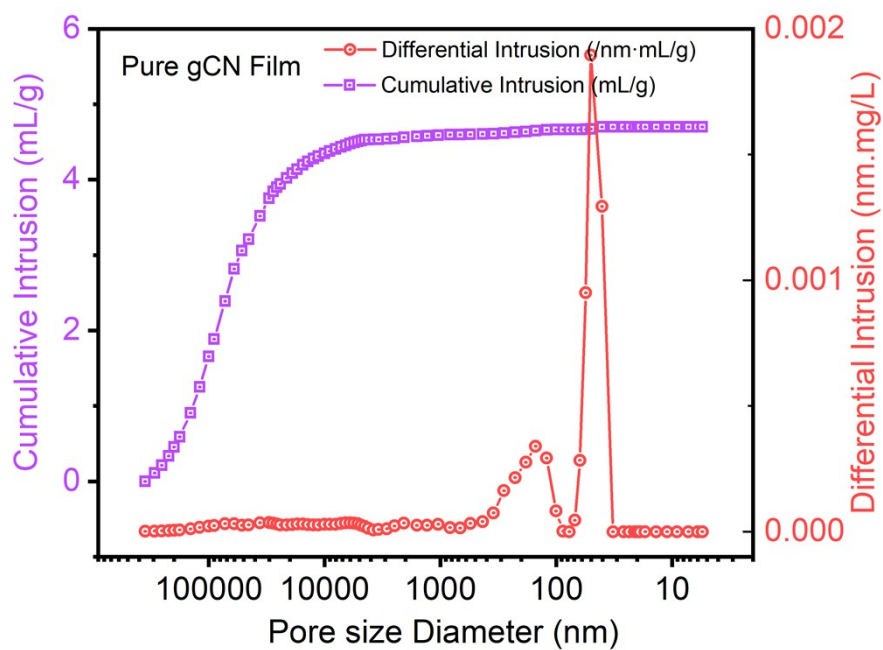

**Figure S20.** Mercury intrusion porosimetry of the mixed matrix MS g-CN membrane (without PTFE backings).

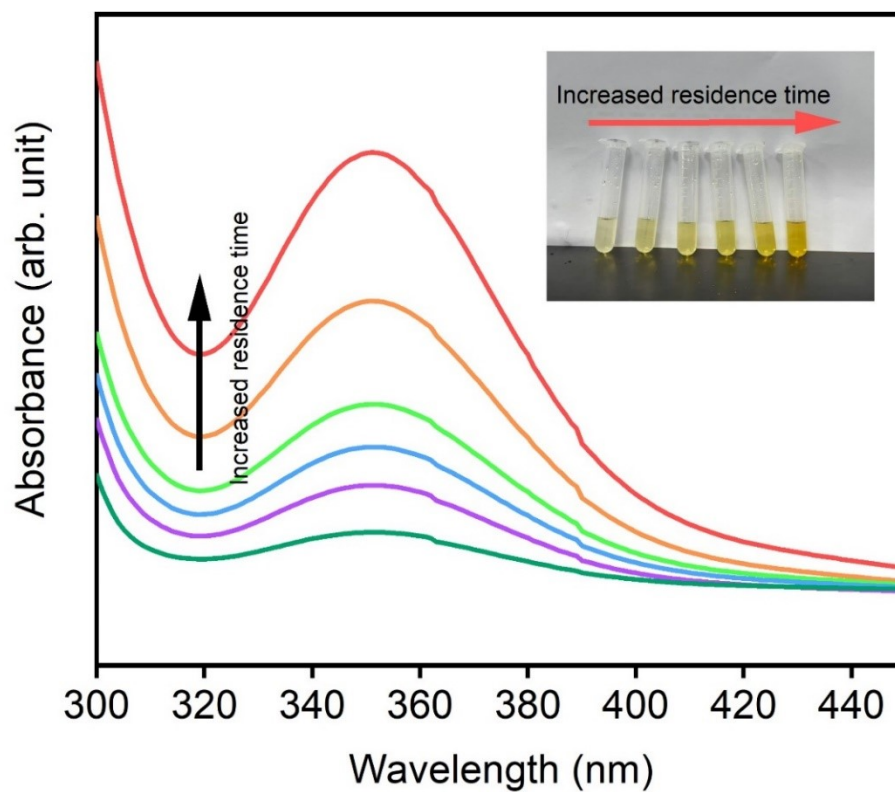

**Figure S21.** Concentration of H<sub>2</sub>O<sub>2</sub> generated at different residence times (*i.e.*, different flow rates) using the MS *g*-CN/PTFE membrane catalyst.

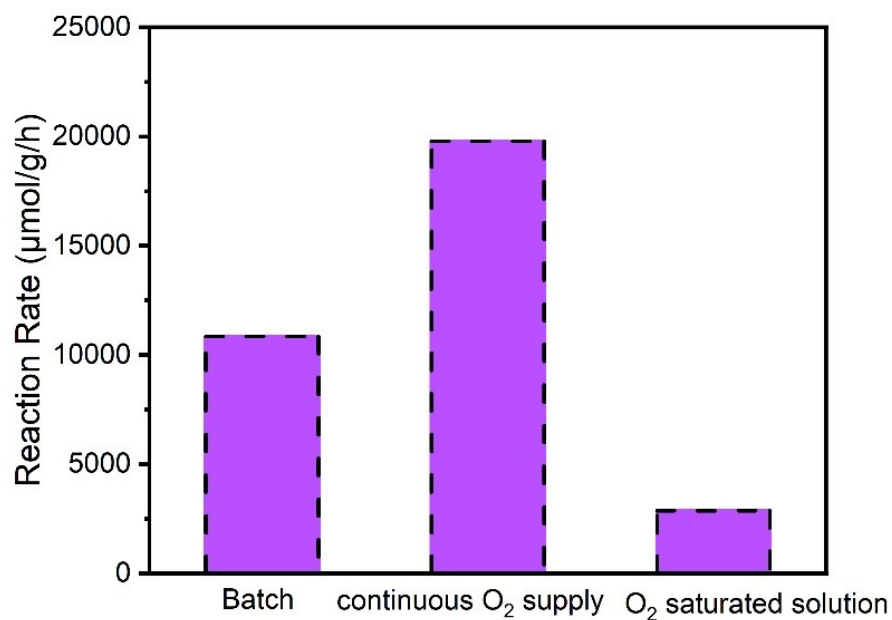

**Figure S22.** The influence of oxygen diffusion pathways on reactor performance.

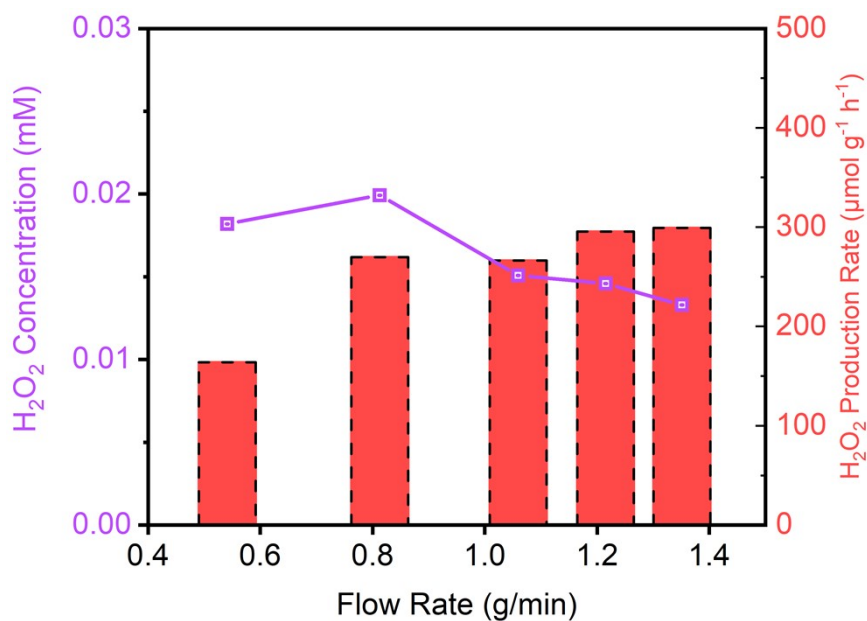

**Figure S23.** Continuous-flow production of H<sub>2</sub>O<sub>2</sub> using the MS g-CN/PTFE membrane in a 9 cm<sup>2</sup> triphasic membrane reactor without adding IPA as the sacrificial agent under white light illumination.

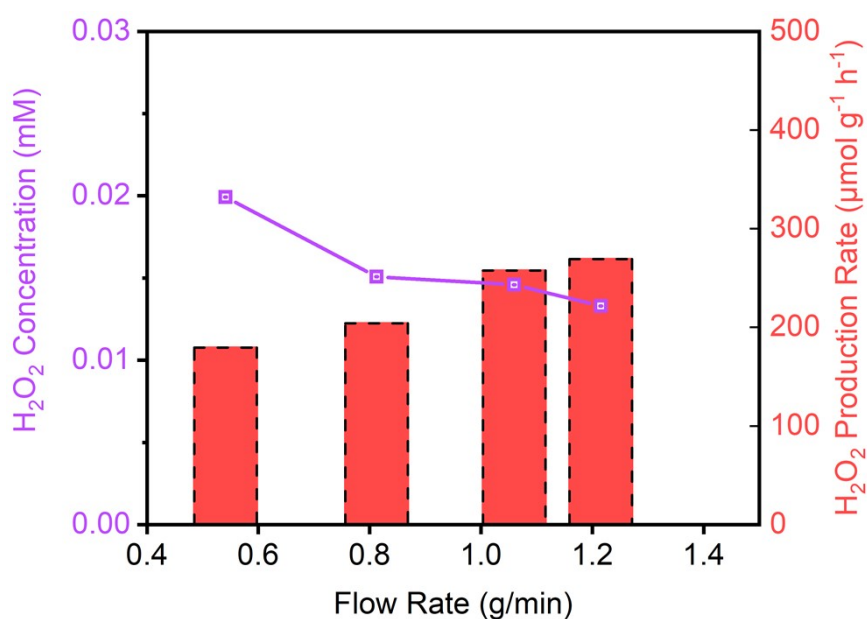

**Figure S24.** Continuous flow production of H<sub>2</sub>O<sub>2</sub> using the mixed matrix MS g-CN membrane (without PTFE backings) in a 9 cm<sup>2</sup> triphasic membrane reactor under white light illumination.

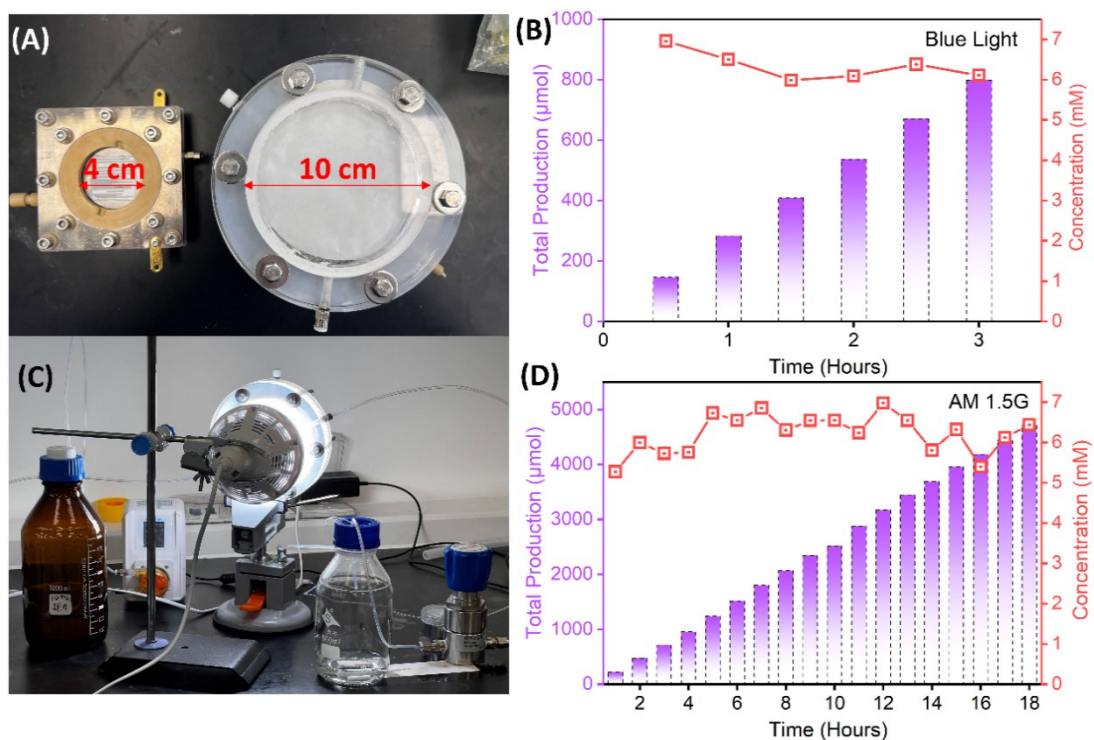

**Figure S25. Scale-up of the membrane reactor for continuous H<sub>2</sub>O<sub>2</sub> production.**

(A) Photograph comparing the original 4 cm-diameter reactor with the enlarged 10 cm-diameter reactor; (B) Time-dependent H<sub>2</sub>O<sub>2</sub> production in the enlarged reactor under blue-light irradiation at XXX bar of O<sub>2</sub>; (C) Photograph of the enlarged membrane reactor operating under reaction conditions with AM 1.5G simulated solar illumination; (D) Time-dependent H<sub>2</sub>O<sub>2</sub> production in the 10 cm reactor under AM 1.5G irradiation at XXX bar of O<sub>2</sub>, showing both productivity (left) and outlet concentration (right).

## Supplementary Tables

**Table S1.** Recovery of the iodometric method used for H<sub>2</sub>O<sub>2</sub> quantification

| <b>Sample</b> | <b>C<sub>origin</sub></b> | <b>C<sub>add</sub></b> | <b>C<sub>calculated</sub></b> | <b>C<sub>test</sub></b> | <b>Difference<br/>%</b> |
|---------------|---------------------------|------------------------|-------------------------------|-------------------------|-------------------------|
| 1             | 1.8                       | 4.2                    | 3.05                          | 3.3                     | 8.3                     |
| 2             | 5.6                       | 4.2                    | 4.9                           | 5.3                     | 6.8                     |
| 3             | 5.4                       | 4.2                    | 4.8                           | 5.2                     | 8.4                     |

**Table S2.** Geometric parameters, operating conditions, and material properties used in the simulations.

| Parameters          | Value                   | Description                        |
|---------------------|-------------------------|------------------------------------|
| $T$                 | 298.15 K                | Temperature                        |
| $H_{mac}$           | 150 $\mu\text{m}$       | Depth of macroporous layer         |
| $H_{mic}$           | 30 $\mu\text{m}$        | Depth of microporous layer         |
| $W$                 | 500 $\mu\text{m}$       | Weight of geometry                 |
| $P_{\text{oxygen}}$ | 1 atm                   | O <sub>2</sub> inlet pressure      |
| $P_{\text{water}}$  | 1 atm                   | Water inlet pressure               |
| $d_{mac}$           | 57 $\mu\text{m}$        | Average pore size of the Mac layer |
| $d_{mic}$           | 1.51 $\mu\text{m}$      | Average pore size of the Mic layer |
| $\gamma_{mac}$      | 116.9°                  | Contact angle of the Mac layer     |
| $\gamma_{mic}$      | 147°                    | Contact angle of the Mic layer     |
| $\varepsilon$       | 0.5                     | Porosity                           |
| $\gamma$            | 0.072 N m <sup>-1</sup> | Surface tension                    |

**Table S3. Performance tracker of carbon nitride-based catalysts on H<sub>2</sub>O<sub>2</sub> production.**

| Catalyst                                                                         | H <sub>2</sub> O <sub>2</sub> Yield Rate<br>( $\mu\text{mol g}^{-1} \text{h}^{-1}$ ) | Concentration ( $\mu\text{M}$ ) | Sacrificial Agent  | Electron Transfer (n) | Ref.            |
|----------------------------------------------------------------------------------|--------------------------------------------------------------------------------------|---------------------------------|--------------------|-----------------------|-----------------|
| <b>MS <i>g</i>-CN</b>                                                            | <b>10,800</b>                                                                        | <b>8,700</b>                    | <b>Isopropanol</b> | <b>2.0</b>            | <b>Our work</b> |
| PCNHS                                                                            | 1,648                                                                                | 95                              | Isopropanol        | 2.2                   | 11              |
| <i>g</i> -C <sub>3</sub> N <sub>4</sub> /In <sub>2</sub> S <sub>3</sub> -<br>10% | 92                                                                                   | 294                             | None               | --                    | 22              |
| CoO <sub>x</sub> -N <sub>v</sub> CN                                              | 250                                                                                  | 250                             | None               | 2.3                   | 23              |
| P-mMCNNS-<br>25                                                                  | 1,083                                                                                | 3,249                           | Ethanol            | --                    | 24              |
| B- <i>g</i> -C <sub>3</sub> N <sub>4</sub> -20                                   | 419                                                                                  | 419                             | Isopropanol        | --                    | 25              |
| CPCN                                                                             | 1,569                                                                                | 471                             | Ethanol            | --                    | 26              |
| CN/CFS,N                                                                         | 1,318                                                                                | 1,600                           | Ethanol            | 1.0                   | 27              |
| NH <sub>3</sub> -NaClO <sub>0.5</sub> -<br>CN <sub>w</sub>                       | 1,038                                                                                | 415                             | Ethanol            | 2.2                   | 28              |
| BCN400                                                                           | 600                                                                                  | 400                             | Ethanol            | 2.0                   | 29              |
| DCN                                                                              | 351                                                                                  | 352                             | Ethanol            | --                    | 30              |
| SS-CN                                                                            | 567                                                                                  | 275                             | Isopropanol        | 2.0                   | 31              |
| N4%/O <sub>0.2</sub> tCN                                                         | 2,464                                                                                | 1,230                           | Ethanol            | 2.2                   | 32              |
| O-CNC                                                                            | 2,008                                                                                | 4,000                           | Isopropanol        | --                    | 33              |
| m-CNNP                                                                           | 43                                                                                   | 43                              | Isopropanol        | 1.9                   | 34              |
| CNCF <sub>2</sub>                                                                | 1,100                                                                                | 1,100                           | Ethanol            | 1.7                   | 35              |
| CN-ND                                                                            | 200                                                                                  | 85                              | Ethanol            | --                    | 36              |
| CM-CN <sub>3</sub>                                                               | 150                                                                                  | 150                             | Ethanol            | --                    | 37              |

|                                                |       |       |             |     |    |
|------------------------------------------------|-------|-------|-------------|-----|----|
| FI-CN-530                                      | 952   | 200   | Ethanol     | --  | 38 |
| 0.019Ru-TCN                                    | 296   | 300   | Isopropanol | --  | 39 |
| CN-HMoP-3                                      | 274   | 700   | Ethanol     | --  | 40 |
| CDs <sub>10</sub> MCN                          | 423   | 1,480 | Isopropanol | --  | 41 |
| Bi <sub>3.6</sub> K <sub>3</sub> -CN           | 1,342 | 4,340 | Ethanol     | 2.2 | 42 |
| pCN1                                           | 707   | 3,500 | Isopropanol | 1.2 | 43 |
| CN-0.5                                         | 73    | 300   | Ethanol     | --  | 44 |
| CoP/Co@NPC<br>/g-C <sub>3</sub> N <sub>4</sub> | 940   | 563   | Isopropanol | --  | 45 |
| g-C <sub>3</sub> N <sub>4</sub> -0.05          | 704   | 2,750 | Isopropanol | 2.2 | 46 |
| TC/CN-20                                       | 561   | 580   | Ethanol     | --  | 47 |
| DPCN                                           | 2830  | 283   | Ethanol     | --  | 48 |

---

**Table S4.** Factors that affect performance in photocatalytic H<sub>2</sub>O<sub>2</sub> generation.<sup>1</sup>

| Run | Temperature (°C) | Sacrificial agent | Atmosphere     | Performance (mmol g <sub>catalyst</sub> <sup>-1</sup> h <sup>-1</sup> ) |
|-----|------------------|-------------------|----------------|-------------------------------------------------------------------------|
| 1   | 10               | IPA               | Air            | 4.67                                                                    |
| 2   | 20               | IPA               | Air            | 9.02                                                                    |
| 3   | 30               | IPA               | Air            | 12.80                                                                   |
| 4   | 40               | IPA               | Air            | 9.58                                                                    |
| 5   | 50               | IPA               | Air            | 5.31                                                                    |
| 6   | 20               | None              | O <sub>2</sub> | 0.42                                                                    |
| 7   | 20               | None              | Air            | 0.26                                                                    |
| 8   | 20               | None              | Ar             | 0.15                                                                    |

<sup>1</sup> Test condition: The experiment was conducted in a batch reaction. Typically, 20 mg of catalyst powder was dispersed in 25 mL of a 10 vol% IPA solution in Runs 1 ~ 5. The reaction system is the same for Runs 6 ~ 8, except for the removal of IPA. Blue light (450 nm) was used as the light source.
